# Supplementary material for: What Sustains Mask-Wearing Behavior among Elders in a Rural Community in the Post-COVID-19 Era: An Exploratory Mixed-Methods Study
Source: MDPI journal article supplement (doi:10.3390/bs13080678), 2023-08-11
Supplement: s1 [file s1]

### **Supplementary File**

|                                                                                                  |           |
|--------------------------------------------------------------------------------------------------|-----------|
| Table S1. Exploratory factor analysis of mask wearing questionnaire.                             | Page 2-3  |
| Table S2. Thematic analysis of participants' themes, subthemes, and codes                        | Page 4    |
| Table S3. Factors influencing mask-wearing among elders in a rural community in central Thailand | Page 5-7  |
| Figure S1. Full questionnaire used in the study.                                                 | Page 8-10 |

Supplementary Table S1. Exploratory factor analysis of mask wearing questionnaire

| Questionnaire items                                                                                                                                                 | Domains      |              |              |              |          |              |          |              |              |
|---------------------------------------------------------------------------------------------------------------------------------------------------------------------|--------------|--------------|--------------|--------------|----------|--------------|----------|--------------|--------------|
|                                                                                                                                                                     | Domain 1     | Domain 2     | Domain 3     | Domain 4     | Domain 5 | Domain 6     | Domain 7 | Domain 8     | Domain 9     |
| 1. Currently, I am willing to wear a face mask                                                                                                                      | <b>0.862</b> | 0.191        | 0.010        | 0.092        | -0.008   | 0.193        | -0.083   | -0.037       | 0.204        |
| 2. I am willing to spend money on face masks                                                                                                                        | <b>0.717</b> | 0.144        | 0.017        | 0.079        | 0.025    | 0.064        | -0.125   | 0.076        | 0.119        |
| 3. I always suggest that others wear masks                                                                                                                          | 0.366        | 0.190        | -0.182       | 0.210        | 0.022    | -0.263       | -0.205   | 0.176        | 0.024        |
| 4. I am willing to wear a mask, despite the official announcement not to enforce mask wearing                                                                       | <b>0.854</b> | 0.123        | 0.082        | 0.153        | 0.006    | 0.122        | -0.033   | 0.166        | 0.095        |
| 5. After an official announcement not to enforce face mask-wearing; how long do you plan to wear a mask?                                                            | <b>0.560</b> | 0.322        | 0.058        | 0.172        | 0.159    | 0.079        | -0.105   | 0.109        | -0.080       |
| 6. In the past month, how frequently did you change your face mask?                                                                                                 | 0.078        | <b>0.659</b> | 0.022        | 0.144        | -0.017   | 0.050        | 0.144    | 0.237        | 0.255        |
| 7. In the past month, did you wear a mask?                                                                                                                          | 0.145        | <b>0.830</b> | -0.063       | 0.138        | 0.025    | -0.057       | 0.103    | 0.083        | 0.124        |
| 8. How frequently did you wear a mask weekly?                                                                                                                       | 0.213        | <b>0.467</b> | -0.036       | 0.213        | -0.070   | 0.138        | 0.050    | 0.032        | -0.148       |
| 9. I always bring a mask every time I go outside                                                                                                                    | 0.201        | <b>0.514</b> | 0.010        | 0.029        | 0.018    | 0.027        | 0.048    | 0.297        | 0.100        |
| 10. I am familiar with mask-wearing                                                                                                                                 | 0.243        | <b>0.509</b> | -0.004       | 0.266        | 0.085    | 0.204        | -0.027   | 0.172        | -0.081       |
| 11. I believe that COVID-19 is still spreading throughout my community                                                                                              | 0.043        | 0.083        | -0.047       | 0.142        | -0.005   | 0.111        | -0.072   | 0.041        | <b>0.465</b> |
| 12. I believe that COVID-19 can reemerge in the future                                                                                                              | 0.259        | -0.047       | 0.078        | 0.099        | 0.146    | 0.078        | 0.043    | 0.122        | <b>0.396</b> |
| 13. I still feel anxious about being infected with COVID-19                                                                                                         | 0.301        | 0.170        | 0.026        | 0.134        | 0.080    | 0.088        | -0.141   | 0.203        | <b>0.386</b> |
| 14. I feel anxious or disgusted when someone not wearing a mask gets close to me                                                                                    | 0.205        | 0.147        | 0.028        | 0.111        | -0.017   | -0.036       | -0.212   | <b>0.433</b> | 0.002        |
| 15. I wear a mask to protect myself from air pollution                                                                                                              | 0.103        | 0.239        | -0.105       | 0.090        | -0.003   | 0.134        | -0.005   | <b>0.616</b> | 0.042        |
| 16. I wear a mask to protect myself against other respiratory infections apart from COVID-19                                                                        | -0.007       | 0.167        | -0.207       | 0.149        | 0.027    | 0.059        | 0.096    | <b>0.627</b> | 0.252        |
| 17*. I trusted that Andrographis paniculata could effectively prevent COVID-19, so I reduced my mask-wearing.                                                       | 0.002        | 0.035        | <b>0.757</b> | -0.003       | 0.067    | -0.001       | -0.045   | 0.001        | 0.045        |
| 18*. I trusted that practices such as eating cooked food, using serving spoons, and washing hands could effectively prevent COVID-19, so I reduced my mask-wearing. | 0.085        | 0.029        | <b>0.944</b> | 0.012        | 0.061    | 0.076        | -0.007   | -0.078       | 0.028        |
| 19*. I trusted that cloth face masks could effectively prevent COVID-19, so I reduced my mask-wearing                                                               | 0.036        | -0.063       | <b>0.398</b> | 0.069        | 0.124    | 0.088        | -0.021   | -0.075       | -0.034       |
| 20. I believe in the effectiveness of face masks for COVID-19 protection.                                                                                           | 0.126        | 0.180        | 0.012        | <b>0.757</b> | -0.057   | -0.031       | 0.140    | 0.067        | 0.337        |
| 21. I believe that mask-wearing helps reduce the spread of COVID-19                                                                                                 | 0.228        | 0.167        | 0.004        | <b>0.725</b> | 0.014    | 0.043        | 0.053    | 0.159        | 0.155        |
| 22. Wearing a face mask improves my self-esteem                                                                                                                     | 0.143        | 0.227        | 0.166        | <b>0.467</b> | -0.048   | 0.084        | -0.073   | 0.185        | -0.013       |
| 23. I believe that using a face mask makes me look better                                                                                                           | 0.041        | 0.170        | -0.127       | 0.287        | -0.069   | 0.223        | 0.230    | 0.011        | 0.089        |
| 24*. I feel uncomfortable when wearing a mask                                                                                                                       | 0.121        | 0.055        | 0.015        | 0.098        | 0.162    | <b>0.742</b> | -0.132   | 0.013        | 0.036        |
| 25*. Wearing a mask impairs my work productivity                                                                                                                    | 0.194        | 0.023        | 0.042        | 0.010        | 0.147    | <b>0.565</b> | -0.080   | 0.039        | 0.046        |
| 26*. Wearing a mask can be an obstacle to communication                                                                                                             | -0.008       | 0.105        | 0.143        | 0.023        | 0.128    | <b>0.535</b> | -0.018   | 0.106        | 0.168        |

|                                                                        |             |             |             |             |              |             |              |             |             |
|------------------------------------------------------------------------|-------------|-------------|-------------|-------------|--------------|-------------|--------------|-------------|-------------|
| 27. I wear a face mask because it is a social measure.                 | -0.074      | 0.085       | -0.075      | 0.047       | -0.136       | -0.104      | <b>0.744</b> | -0.052      | -0.088      |
| 28. I wear a face mask because others are also wearing them.           | -0.209      | 0.172       | 0.007       | 0.117       | -0.112       | -0.136      | <b>0.736</b> | 0.014       | -0.015      |
| 29. I wear a face mask to conceal my poor oral hygiene                 | 0.142       | 0.074       | -0.286      | 0.173       | -0.039       | 0.020       | -0.265       | 0.231       | 0.071       |
| 30*. I don't have enough high-quality face masks to meet the standard. | 0.003       | -0.027      | 0.153       | -0.007      | 0.351        | 0.099       | -0.106       | -0.039      | -0.056      |
| 31*. The high price is affecting my decision to purchase a face mask.  | 0.038       | -0.017      | 0.042       | -0.088      | <b>0.634</b> | 0.134       | -0.028       | 0.071       | 0.093       |
| 32*. I don't have enough money to afford using a face mask daily.      | 0.136       | -0.006      | 0.083       | -0.001      | <b>0.763</b> | 0.108       | -0.009       | 0.092       | -0.086      |
| 33*. I think that buying face masks increases my financial burden.     | -0.054      | 0.094       | 0.015       | 0.024       | <b>0.708</b> | 0.041       | -0.083       | -0.126      | 0.201       |
| <b>Eigenvalues</b>                                                     | <b>6.40</b> | <b>3.32</b> | <b>2.29</b> | <b>2.00</b> | <b>1.59</b>  | <b>1.50</b> | <b>1.44</b>  | <b>1.23</b> | <b>1.08</b> |

Extraction Method: Maximum Likelihood. Rotation Method: Varimax with Kaiser Normalization. Rotation converged in 6 iterations.

\* Negative questions

Supplementary Table S2. Thematic analysis of participants' themes, subthemes, and codes

| Theme                   | Sub-theme                                                 | Code                                                                                                                                                                                                                           |
|-------------------------|-----------------------------------------------------------|--------------------------------------------------------------------------------------------------------------------------------------------------------------------------------------------------------------------------------|
| Facilitators/Motivators | Perceived benefits of mask-wearing                        | disease prevention; confidence in the effectiveness of the mask; reducing COVID-19 infection rate; preventing the spread of respiratory infections; protection from dust, protection from PM2.5                                |
|                         | Perceived threat of COVID-19                              | COVID-19 might return; visitors might carry COVID-19; having respiratory symptoms; uncertainty about other people; fear of contracting COVID-19; COVID-19 can lead to hospitalization                                          |
|                         | Mask wearing enhancing attractiveness and self-confidence | increase self-confidence; hide poor oral hygiene; feeling more confident after wearing a mask; looking cleaner after wearing a mask                                                                                            |
|                         | Social norms and new-normal                               | wearing mask in crowded areas; necessary for leaving the house; other people wear the mask; there are many people around; familiarity and habit; disgusted by those not wearing a mask; role model in wearing a mask           |
| Barriers/Obstacles      | Misconceptions about COVID-19 prevention tools            | <i>Andrographis paniculata</i> could prevent COVID-19; eating hot food could prevent COVID-19; eating with middle spoon and washing hands is enough to prevent COVID-19; cloth face mask is as effective as surgical face mask |
|                         | Perceived barriers to mask-wearing                        | hinders communication; suffocating; difficult to smoke; allergic to masks; blocking makeup; hot and humid; hinders working; more prone to fatigue                                                                              |
|                         | Resources to afford face masks                            | no standard masks available; unable to afford to buy masks; shortage of masks; expensive                                                                                                                                       |

Supplementary Table S3. Factors influencing mask-wearing among elders in a rural community in central Thailand

| Questions                                                                                                       | Mask adherence | 5<br>n (%)  | 4<br>n (%) | 3<br>n (%) | 2<br>n (%) | 1<br>n (%) | $\lambda$ |
|-----------------------------------------------------------------------------------------------------------------|----------------|-------------|------------|------------|------------|------------|-----------|
| Willingness to wear face masks                                                                                  |                |             |            |            |            |            |           |
| Will 1. Currently, I am willing to wear a face mask                                                             | Not adhering   | 13 (34.2)   | 1 (2.6)    | 8 (21.1)   | 2 (5.3)    | 14 (36.8)  | 0.86      |
|                                                                                                                 | Adhering       | 108 (66.3)  | 10 (6.1)   | 7 (4.3)    | 3 (1.8)    | 35 (21.5)  |           |
| Will 2. I am willing to spend money on face masks                                                               | Not adhering   | 17 (44.7)   | 3 (7.9)    | 3 (7.9)    | 3 (7.9)    | 12 (31.6)  | 0.72      |
|                                                                                                                 | Adhering       | 103 (63.2)  | 12 (7.4)   | 7 (4.3)    | 4 (2.5)    | 37 (22.7)  |           |
| Will 3. I am willing to wear a mask, despite the official announcement not to enforce mask wearing              | Not adhering   | 18 (47.4)   | 1 (2.6)    | 3 (7.9)    | 4 (10.5)   | 12 (31.6)  | 0.85      |
|                                                                                                                 | Adhering       | 111 (68.1)  | 10 (6.1)   | 7 (4.3)    | 2 (1.2)    | 33 (20.2)  |           |
| **Will 4. After an official announcement not to enforce face mask-wearing; how long do you plan to wear a mask? | Not adhering   | 12 (31.6)   | 4 (10.5)   | 4 (10.5)   | 2 (5.3)    | 16 (42.1)  | 0.56      |
|                                                                                                                 | Adhering       | 105 (64.4)  | 12 (7.4)   | 19 (11.7)  | 5 (3.1)    | 22 (13.5)  |           |
| Overall Willingness Likert score (Mean±SD)                                                                      | Not adhering   | 3.07±1.50   |            |            |            | t          | p-value   |
|                                                                                                                 | Adhering       | 3.97±1.36   |            |            |            | -3.610     |           |
| Mask wearing practice                                                                                           |                |             |            |            |            |            |           |
| **Prac 1. In the past month, did you wear a mask?                                                               | Not adhering   | 0           | 0          | 28 (100.0) | 0          | 10 (100.0) | 0.83      |
|                                                                                                                 | Adhering       | 163 (100.0) | 0          | 0          | 0          | 0          |           |
| **Prac 2. In the past month, how frequently did you change your face mask?                                      | Not adhering   | 2 (5.3)     | 5 (13.2)   | 10 (26.3)  | (28.9)     | 10 (26.3)  | 0.66      |
|                                                                                                                 | Adhering       | 62 (38.0)   | 22 (13.5)  | 38 (23.3)  | (23.9)     | 2 (1.2)    |           |
| **Prac 3. How frequently did you wear a mask weekly?                                                            | Not adhering   | 2 (5.3)     | 22 (57.9)  | 4 (10.5)   | 0 (0)      | 10 (26.3)  | 0.47      |
|                                                                                                                 | Adhering       | 41 (25.2)   | 106 (65.0) | 13 (8.0)   | 3 (1.8)    | 0 (0)      |           |
| Prac 4. I always bring a mask every time I go outside                                                           | Not adhering   | 24 (63.2)   | 3 (7.9)    | 1 (2.6)    | 2 (5.3)    | 8 (21.1)   | 0.51      |
|                                                                                                                 | Adhering       | 149 (91.4)  | 7 (4.3)    | 3 (1.8)    | 2 (1.2)    | 2 (1.2)    |           |
| Prac 5. I am familiar with mask-wearing                                                                         | Not adhering   | 14 (36.8)   | 2 (5.3)    | 5 (13.2)   | 4 (10.5)   | 13 (34.2)  | 0.51      |
|                                                                                                                 | Adhering       | 133 (81.6)  | 9 (5.5)    | 2 (1.2)    | 3 (1.8)    | 16 (9.8)   |           |
| Overall mask wearing practice Likert score (Mean±SD)                                                            | Not adhering   | 2.93±1.19   |            |            |            | t          | p-value   |
|                                                                                                                 | Adhering       | 4.41±0.47   |            |            |            | -12.331    |           |
| Perceived threat toward COVID-19                                                                                |                |             |            |            |            |            |           |
| Threat 1. I believe that COVID-19 is still spreading throughout my community                                    | Not adhering   | 6 (15.8)    | 2 (5.3)    | 3 (7.9)    | 3 (7.9)    | 24 (63.2)  | 0.47      |
|                                                                                                                 | Adhering       | 56 (34.4)   | 12 (7.4)   | 15 (9.2)   | 8 (4.9)    | 72 (44.2)  |           |
| Threat 2. I believe that COVID-19 can reemerge in the future                                                    | Not adhering   | 13 (34.2)   | 2 (5.3)    | 7 (18.4)   | 1 (2.6)    | 15 (39.5)  | 0.40      |
|                                                                                                                 | Adhering       | 56 (34.4)   | 19 (11.7)  | 26 (16.0)  | 9 (5.5)    | 53 (32.5)  |           |
| Threat 3. I still feel anxious about being infected with COVID-19                                               | Not adhering   | 5 (13.2)    | 1 (2.6)    | 4 (10.5)   | 0 (0)      | 28 (73.7)  | 0.39      |
|                                                                                                                 | Adhering       | 64 (39.3)   | 6 (3.7)    | 19 (11.7)  | 10 (6.1)   | 64 (39.3)  |           |
| Overall perceived threat Likert score (Mean±SD)                                                                 | Not adhering   | 2.25±1.12   |            |            |            | t          | p-value   |
|                                                                                                                 | Adhering       | 2.97±1.31   |            |            |            | -3.106     |           |
| Alternative perceived threat aside from COVID-19                                                                |                |             |            |            |            |            |           |
| Alt threat 1. I feel anxious or disgusted when someone not wearing a mask gets close to me                      | Not adhering   | 9 (23.7)    | 2 (5.3)    | 5 (13.2)   | 3 (7.9)    | 19 (50.0)  | 0.43      |
|                                                                                                                 | Adhering       | 66 (40.5)   | 16 (9.8)   | 14 (8.6)   | 9 (5.5)    | 58 (35.6)  |           |

|                                                                                                                                                                               |              |            |           |           |          |           |                |
|-------------------------------------------------------------------------------------------------------------------------------------------------------------------------------|--------------|------------|-----------|-----------|----------|-----------|----------------|
| <b>Alt threat 2.</b> I wear a mask to protect myself from air pollution                                                                                                       | Not adhering | 19 (50.0)  | 1 (2.6)   | 3 (7.9)   | 1 (2.6)  | 14 (36.8) | 0.62           |
|                                                                                                                                                                               | Adhering     | 107 (65.6) | 21 (12.9) | 3 (1.8)   | 5 (3.1)  | 27 (16.6) |                |
| <b>Alt threat 3.</b> I wear a mask to protect myself against other respiratory infections apart from COVID-19                                                                 | Not adhering | 13 (34.2)  | 0 (0)     | 2 (5.3)   | 0 (0)    | 23 (60.5) | 0.63           |
|                                                                                                                                                                               | Adhering     | 82 (50.3)  | 15 (9.2)  | 12 (7.4)  | 2 (1.2)  | 52 (31.9) |                |
| Overall alternative perceived threat Likert score (Mean±SD)                                                                                                                   | Not adhering |            | 2.73±1.57 |           |          | <b>t</b>  | <b>p-value</b> |
|                                                                                                                                                                               | Adhering     |            | 3.56±1.22 |           |          | -3.551    | <0.001         |
| Misconception in COVID-19 prevention tools                                                                                                                                    |              |            |           |           |          |           |                |
| <b>*Mis 1.</b> I trusted that Andrographis paniculata could effectively prevent COVID-19, so I reduced my mask-wearing.                                                       | Not adhering | 24 (63.2)  | 0 (0)     | 5 (13.2)  | 2 (5.3)  | 7 (18.4)  | 0.76           |
|                                                                                                                                                                               | Adhering     | 89 (54.6)  | 14 (8.6)  | 18 (11.0) | 9 (5.5)  | 33 (20.2) |                |
| <b>*Mis 2.</b> I trusted that practices such as eating cooked food, using serving spoons, and washing hands could effectively prevent COVID-19, so I reduced my mask-wearing. | Not adhering | 23 (60.5)  | 1 (2.6)   | 1 (2.6)   | 2 (5.3)  | 11 (28.9) | 0.94           |
|                                                                                                                                                                               | Adhering     | 82 (50.3)  | 9 (5.5)   | 11 (6.7)  | 13 (8.0) | 48 (29.4) |                |
| <b>*Mis 3.</b> I trusted that cloth face masks could effectively prevent COVID-19, so I reduced my mask-wearing                                                               | Not adhering | 23 (60.5)  | 2 (5.3)   | 5 (13.2)  | 0 (0)    | 8 (21.1)  | 0.40           |
|                                                                                                                                                                               | Adhering     | 89 (54.6)  | 13 (8.0)  | 15 (9.2)  | 5 (3.1)  | 41 (25.2) |                |
| Overall misconception Likert score (Mean±SD)                                                                                                                                  | Not adhering |            | 3.76±1.35 |           |          | <b>t</b>  | <b>p-value</b> |
|                                                                                                                                                                               | Adhering     |            | 3.58±1.38 |           |          | 0.727     | 0.234          |
| Perceived benefits of face mask                                                                                                                                               |              |            |           |           |          |           |                |
| <b>Benefits 1.</b> I believe in the effectiveness of face masks for COVID-19 protection.                                                                                      | Not adhering | 11 (28.9)  | 6 (15.8)  | 7 (18.4)  | 3 (7.9)  | 11 (28.9) | 0.76           |
|                                                                                                                                                                               | Adhering     | 78 (47.9)  | 35 (21.5) | 33 (20.2) | 3 (1.8)  | 14 (8.6)  |                |
| <b>Benefits 2.</b> I believe that mask-wearing helps reduce the spread of COVID-19                                                                                            | Not adhering | 16 (42.1)  | 4 (10.5)  | 5 (13.2)  | 3 (7.9)  | 10 (26.3) | 0.73           |
|                                                                                                                                                                               | Adhering     | 107 (65.6) | 21 (12.9) | 17 (10.4) | 2 (1.2)  | 16 (9.8)  |                |
| <b>Benefits 3.</b> Wearing a face mask improves my self-esteem                                                                                                                | Not adhering | 16 (42.1)  | 4 (10.5)  | 3 (7.9)   | 2 (5.3)  | 13 (34.2) | 0.47           |
|                                                                                                                                                                               | Adhering     | 110 (67.5) | 10 (6.1)  | 10 (6.1)  | 4 (2.5)  | 29 (17.8) |                |
| Overall perceived benefits Likert score (Mean±SD)                                                                                                                             | Not adhering |            | 3.21±1.47 |           |          | <b>t</b>  | <b>p-value</b> |
|                                                                                                                                                                               | Adhering     |            | 4.08±1.07 |           |          | -4.193    | <0.001         |
| Discomfort when wearing a face mask                                                                                                                                           |              |            |           |           |          |           |                |
| <b>*Discomfort 1.</b> I feel uncomfortable when wearing a mask                                                                                                                | Not adhering | 11 (28.9)  | 0 (0)     | 9 (23.7)  | 2 (5.3)  | 16 (42.1) | 0.74           |
|                                                                                                                                                                               | Adhering     | 58 (35.6)  | 12 (7.4)  | 16 (9.8)  | 13 (8.0) | 64 (39.3) |                |
| <b>*Discomfort 2.</b> Wearing a mask impairs my work productivity                                                                                                             | Not adhering | 16 (42.1)  | 1 (2.6)   | 3 (7.9)   | 2 (5.3)  | 16 (42.1) | 0.57           |
|                                                                                                                                                                               | Adhering     | 72 (44.2)  | 10 (6.1)  | 10 (6.1)  | 16 (9.8) | 55 (33.7) |                |
| <b>*Discomfort 3.</b> Wearing a mask can be an obstacle to communication                                                                                                      | Not adhering | 18 (47.4)  | 1 (2.6)   | 3 (7.9)   | 6 (15.8) | 10 (26.3) | 0.54           |
|                                                                                                                                                                               | Adhering     | 94 (57.7)  | 9 (5.5)   | 12 (7.4)  | 14 (8.6) | 34 (20.9) |                |
| Overall discomfort Likert score (Mean±SD)                                                                                                                                     | Not adhering |            | 2.98±1.44 |           |          | <b>t</b>  | <b>p-value</b> |
|                                                                                                                                                                               | Adhering     |            | 3.27±1.38 |           |          | -1.132    | 0.130          |
| Social norms                                                                                                                                                                  |              |            |           |           |          |           |                |
| <b>Social 1.</b> I wear a face mask because it is a social measure.                                                                                                           | Not adhering | 18 (47.4)  | 2 (5.3)   | 2 (5.3)   | 0 (0)    | 16 (42.1) | 0.74           |
|                                                                                                                                                                               | Adhering     | 104 (63.8) | 6 (3.7)   | 9 (5.5)   | 1 (0.6)  | 43 (26.4) |                |
| <b>Social 2.</b> I wear a face mask because others are also wearing them.                                                                                                     | Not adhering | 15 (39.5)  | 1 (2.6)   | 3 (7.9)   | 1 (2.6)  | 18 (47.4) | 0.74           |
|                                                                                                                                                                               | Adhering     | 100 (61.3) | 5 (3.1)   | 9 (5.5)   | 3 (1.8)  | 46 (28.2) |                |
| Overall social norms Likert score (Mean±SD)                                                                                                                                   | Not adhering |            | 3.00±1.69 |           |          | <b>t</b>  | <b>p-value</b> |
|                                                                                                                                                                               | Adhering     |            | 3.73±1.60 |           |          | -2.498    | 0.007          |

| Budget resources for affording face masks                                 |              |           |          |          |           |           |                |
|---------------------------------------------------------------------------|--------------|-----------|----------|----------|-----------|-----------|----------------|
| *Cost 1. The high price is affecting my decision to purchase a face mask. | Not adhering | 18 (47.4) | 1 (2.6)  | 4 (10.5) | 5 (13.2)  | 10 (26.3) | 0.74           |
|                                                                           | Adhering     | 71 (43.6) | 9 (5.5)  | 11 (6.7) | 17 (10.4) | 55 (33.7) |                |
| *Cost 2. I don't have enough money to afford using a face mask daily.     | Not adhering | 23 (60.5) | 1 (2.6)  | 3 (7.9)  | 1 (2.6)   | 10 (26.3) | 0.57           |
|                                                                           | Adhering     | 95 (58.3) | 14 (8.6) | 10 (6.1) | 13 (8.0)  | 31 (19.0) |                |
| *Cost 3. I think that buying face masks increases my financial burden.    | Not adhering | 12 (31.6) | 2 (5.3)  | 2 (5.3)  | 3 (7.9)   | 19 (50.0) | 0.54           |
|                                                                           | Adhering     | 65 (39.9) | 13 (8.0) | 12 (7.4) | 15 (9.2)  | 58 (35.6) |                |
| Overall budget resources Likert score (Mean±SD)                           | Not adhering | 3.20±1.44 |          |          |           | <b>t</b>  | <b>p-value</b> |
|                                                                           | Adhering     | 3.34±1.42 |          |          |           | -0.528    |                |

5= strongly agree, 4= agree, 3= mediocre, 2= disagree, 1= strongly disagree, λ= loading factor

\*Negative questions: 5= strongly disagree, 4= disagree, 3= mediocre, 2= agree, 1= strongly agree

\*\*Answers for the questions are included in the Supplementary Figure S1

## Supplementary Figure S1

### Case Record Form

#### Factors influencing mask-wearing among elders in a rural community in central Thailand

| Demographic data                                                                                                                                                                                            |      |                                                   |
|-------------------------------------------------------------------------------------------------------------------------------------------------------------------------------------------------------------|------|---------------------------------------------------|
| <b>Nationality</b> _____ <b>Age</b> _____ years old <b>Marital status</b> <input type="checkbox"/> Single <input type="checkbox"/> Married <input type="checkbox"/> Divorced <input type="checkbox"/> Widow |      |                                                   |
| <b>Gender</b> <input type="checkbox"/> Male <input type="checkbox"/> Female <input type="checkbox"/> Others                                                                                                 |      | <b>Occupation</b>                                 |
| <b>Education</b>                                                                                                                                                                                            |      | <input type="checkbox"/> Unemployed, Household    |
| <input type="checkbox"/> Less than primary school                                                                                                                                                           |      | <input type="checkbox"/> Agriculturist            |
| <input type="checkbox"/> Primary school                                                                                                                                                                     |      | <input type="checkbox"/> Career, business owner   |
| <input type="checkbox"/> Middle school                                                                                                                                                                      |      | <input type="checkbox"/> Employee                 |
| <input type="checkbox"/> High school                                                                                                                                                                        |      | <input type="checkbox"/> Government officer       |
| <input type="checkbox"/> Bachelor or associate's degree                                                                                                                                                     |      | <input type="checkbox"/> Student                  |
| <input type="checkbox"/> Master's degree or higher                                                                                                                                                          |      | <input type="checkbox"/> Others .....             |
| <b>Moo</b> <input type="checkbox"/> 8 <input type="checkbox"/> 10 <input type="checkbox"/> 13 <input type="checkbox"/> 16                                                                                   |      | <b>Alcohol drinking</b>                           |
| <b>Health care</b>                                                                                                                                                                                          |      | <input type="checkbox"/> 4 times or more per week |
| <input type="checkbox"/> Universal Health Coverage                                                                                                                                                          |      | <input type="checkbox"/> 2-3 times per week       |
| <input type="checkbox"/> Government or State Enterprise Officer                                                                                                                                             |      | <input type="checkbox"/> 2-4 times per months     |
| <input type="checkbox"/> Social Security Scheme                                                                                                                                                             |      | <input type="checkbox"/> Once a month or less     |
| <input type="checkbox"/> Paid                                                                                                                                                                               |      | <input type="checkbox"/> Never                    |
| <b>Smoking</b>                                                                                                                                                                                              |      | <b>Underlying disease</b>                         |
| <input type="checkbox"/> Everyday                                                                                                                                                                           |      | <input type="checkbox"/> Hypertension             |
| <input type="checkbox"/> More than 3 times a week                                                                                                                                                           |      | <input type="checkbox"/> Diabetes mellitus        |
| <input type="checkbox"/> Less than 3 times a week                                                                                                                                                           |      | <input type="checkbox"/> Dyslipidemia             |
| <input type="checkbox"/> Never                                                                                                                                                                              |      | <input type="checkbox"/> Chronic kidney disease   |
| <b>Family Income</b> □,□□□,□□□ baht/month                                                                                                                                                                   |      | <input type="checkbox"/> Others .....             |
| COVID-19 quiz                                                                                                                                                                                               |      |                                                   |
| Is the following statement true?                                                                                                                                                                            | True | False                                             |
| 1. The following symptoms are relevant to COVID-19: fever, cough, runny nose, sore throat and phlegm. Associated symptoms such as diarrhea, fatigue, headache, muscle pain and dyspnea are also possible.   |      |                                                   |
| 2. ATK testing shouldn't be done every day. It should be done when suspected symptoms such as malaise, cough, sore throat and runny nose are noted.                                                         |      |                                                   |
| 3. For those with COVID-19 ATK test positive, antiviral drugs are always needed.                                                                                                                            |      |                                                   |
| 4. When you're infected with COVID-19, supportive medicine is suggested, such as antipyretics and mucolytics. Drinking a lot of water, using a tepid sponge and getting plenty of rest are also             |      |                                                   |



|                                                                                                                                                                |  |  |
|----------------------------------------------------------------------------------------------------------------------------------------------------------------|--|--|
| recommended.                                                                                                                                                   |  |  |
| 5. These interventions could prevent the spread of the COVID-19 virus: social distancing of about 1-2 meters, mask-wearing, and frequently washing your hands. |  |  |
| 6. You should see a doctor if you have severe symptoms such as a fever over 39 degrees Celsius or an oxygen saturation below 94%.                              |  |  |
| 7. After COVID-19 infection, once your COVID-19 ATK test is negative, you could live outside your home normally without wearing a face mask.                   |  |  |
| 8. Wearing a cloth face mask could prevent COVID-19 infection as effectively as a surgical face mask.                                                          |  |  |
| 9. Face masks should be changed daily.                                                                                                                         |  |  |
| 10. To save money, a face mask can be reused by switching the sides of the mask.                                                                               |  |  |

| Mask wearing behavior                                                                                                                                                                                                                                                                                                                                                              |                                                                                                                                                                                                                                                                                                                                                      |
|------------------------------------------------------------------------------------------------------------------------------------------------------------------------------------------------------------------------------------------------------------------------------------------------------------------------------------------------------------------------------------|------------------------------------------------------------------------------------------------------------------------------------------------------------------------------------------------------------------------------------------------------------------------------------------------------------------------------------------------------|
| <p><b>In the past month, did you wear a mask?</b></p> <p><input type="checkbox"/> I always wore a face mask outside their home or when meeting others (5)</p> <p><input type="checkbox"/> sometimes wore a face mask outside their home or when meeting others (3)</p> <p><input type="checkbox"/> I didn't wear a face mask (1)</p>                                               | <p><b>How frequently did you wear a mask weekly?</b></p> <p><input type="checkbox"/> Daily (5)</p> <p><input type="checkbox"/> More than 3 times a week (4)</p> <p><input type="checkbox"/> Less than 3 times a week (3)</p> <p><input type="checkbox"/> Once a week (2)</p> <p><input type="checkbox"/> Didn't wear a face mask (1)</p>             |
| <p><b>After an official announcement not to enforce face mask-wearing; how long do you plan to wear a mask?</b></p> <p><input type="checkbox"/> Immediately (1)</p> <p><input type="checkbox"/> Within 6 months (2)</p> <p><input type="checkbox"/> Within a year (3)</p> <p><input type="checkbox"/> Within 3 years (4)</p> <p><input type="checkbox"/> More than 3 years (5)</p> | <p><b>In the past month, how frequently did you change your face mask?</b></p> <p><input type="checkbox"/> More than once a day (5)</p> <p><input type="checkbox"/> Daily (4)</p> <p><input type="checkbox"/> Every other day (3)</p> <p><input type="checkbox"/> Every 3 day (2)</p> <p><input type="checkbox"/> More than 3 days per piece (1)</p> |

| Developed questionnaire                                                                                                                                            |   |   |   |   |   |
|--------------------------------------------------------------------------------------------------------------------------------------------------------------------|---|---|---|---|---|
| 5 = Strongly agree 4 = Agree 3 = Mediocre 2 = Disagree 1 = Strongly disagree                                                                                       | 5 | 4 | 3 | 2 | 1 |
| I agree with the following statements                                                                                                                              |   |   |   |   |   |
| 1. Currently, I am willing to wear a face mask                                                                                                                     |   |   |   |   |   |
| 2. I am willing to spend money on face masks                                                                                                                       |   |   |   |   |   |
| 3. I always suggest that others wear masks                                                                                                                         |   |   |   |   |   |
| 4. I am willing to wear a mask, despite the official announcement not to enforce mask wearing                                                                      |   |   |   |   |   |
| 5. I always bring a mask every time I go outside                                                                                                                   |   |   |   |   |   |
| 6. I am familiar with mask-wearing                                                                                                                                 |   |   |   |   |   |
| 7. I believe that COVID-19 is still spreading throughout my community                                                                                              |   |   |   |   |   |
| 8. I believe that COVID-19 can reemerge in the future                                                                                                              |   |   |   |   |   |
| 9. I still feel anxious about being infected with COVID-19                                                                                                         |   |   |   |   |   |
| 10. I feel anxious or disgusted when someone not wearing a mask gets close to me                                                                                   |   |   |   |   |   |
| 11. I wear a mask to protect myself from air pollution                                                                                                             |   |   |   |   |   |
| 12. I wear a mask to protect myself against other respiratory infections apart from COVID-19                                                                       |   |   |   |   |   |
| 13. I trusted that Andrographis paniculata could effectively prevent COVID-19, so I reduced my mask-wearing.                                                       |   |   |   |   |   |
| 14. I trusted that practices such as eating cooked food, using serving spoons, and washing hands could effectively prevent COVID-19, so I reduced my mask-wearing. |   |   |   |   |   |
| 15. I trusted that cloth face masks could effectively prevent COVID-19, so I reduced my mask-wearing                                                               |   |   |   |   |   |
| 16. I believe in the effectiveness of face masks for COVID-19 protection.                                                                                          |   |   |   |   |   |
| 17. I believe that mask-wearing helps reduce the spread of COVID-19                                                                                                |   |   |   |   |   |
| 18. Wearing a face mask improves my self-esteem                                                                                                                    |   |   |   |   |   |
| 19. I believe that using a face mask makes me look better                                                                                                          |   |   |   |   |   |
| 20. I feel uncomfortable when wearing a mask                                                                                                                       |   |   |   |   |   |
| 21. Wearing a mask impairs my work productivity                                                                                                                    |   |   |   |   |   |
| 22. Wearing a mask can be an obstacle to communication                                                                                                             |   |   |   |   |   |
| 23. I wear a face mask because it is a social measure.                                                                                                             |   |   |   |   |   |

|                                                                       |  |  |  |  |  |
|-----------------------------------------------------------------------|--|--|--|--|--|
| 24. I wear a face mask because others are also wearing them.          |  |  |  |  |  |
| 25. I wear a face mask to conceal my poor oral hygiene                |  |  |  |  |  |
| 26. I don't have enough high-quality face masks to meet the standard. |  |  |  |  |  |
| 27. The high price is affecting my decision to purchase a face mask.  |  |  |  |  |  |
| 28. I don't have enough money to afford using a face mask daily.      |  |  |  |  |  |
| 29. I think that buying face masks increases my financial burden.     |  |  |  |  |  |
